# Supplementary material for: Morphology-Dependent Catalytic Activity of Ru/CeO2 in Dry Reforming of Methane
Source: MDPI journal article supplement (doi:10.3390/molecules24030526), 2019-02-01
Supplement: s1 [file s1]

# Morphology-dependent catalytic activity of Ru/CeO<sub>2</sub> in dry reforming of methane

Lulu He <sup>1</sup>, Yuanhang Ren <sup>1</sup>, Yingyi Fu <sup>1</sup>, Bin Yue <sup>1,\*</sup> Shik Chi Edman Tsang,<sup>2</sup> and Heyong He <sup>1,\*</sup>

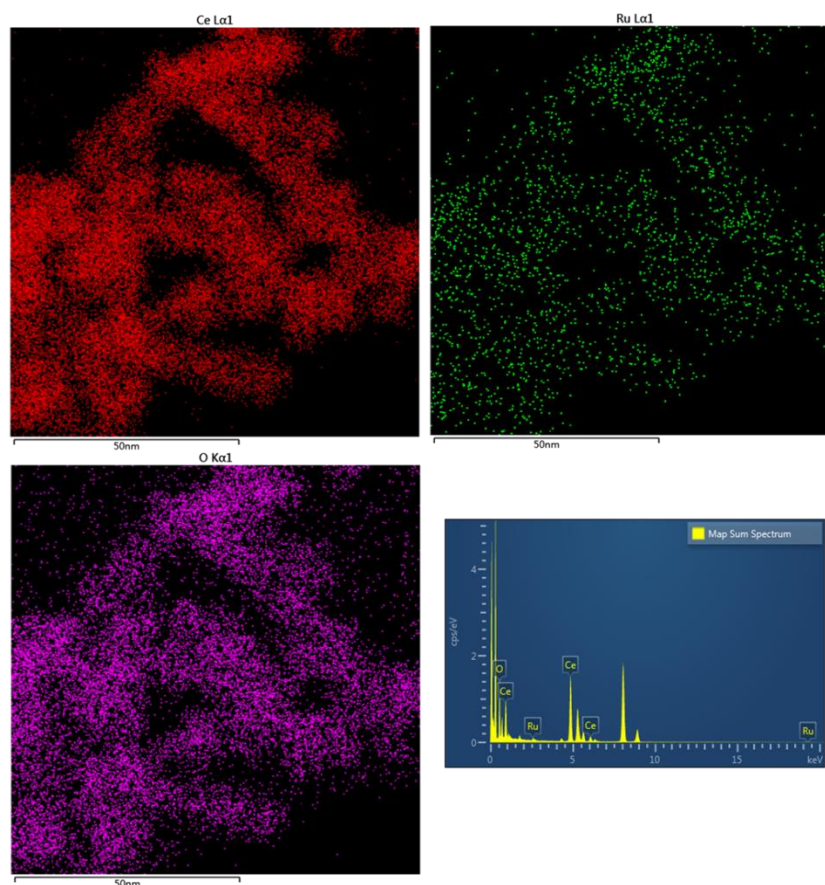

Figure S1: Ce, Ru and O mapping with EDS spectrum of the Ru/CeO<sub>2</sub>-NRs catalyst.

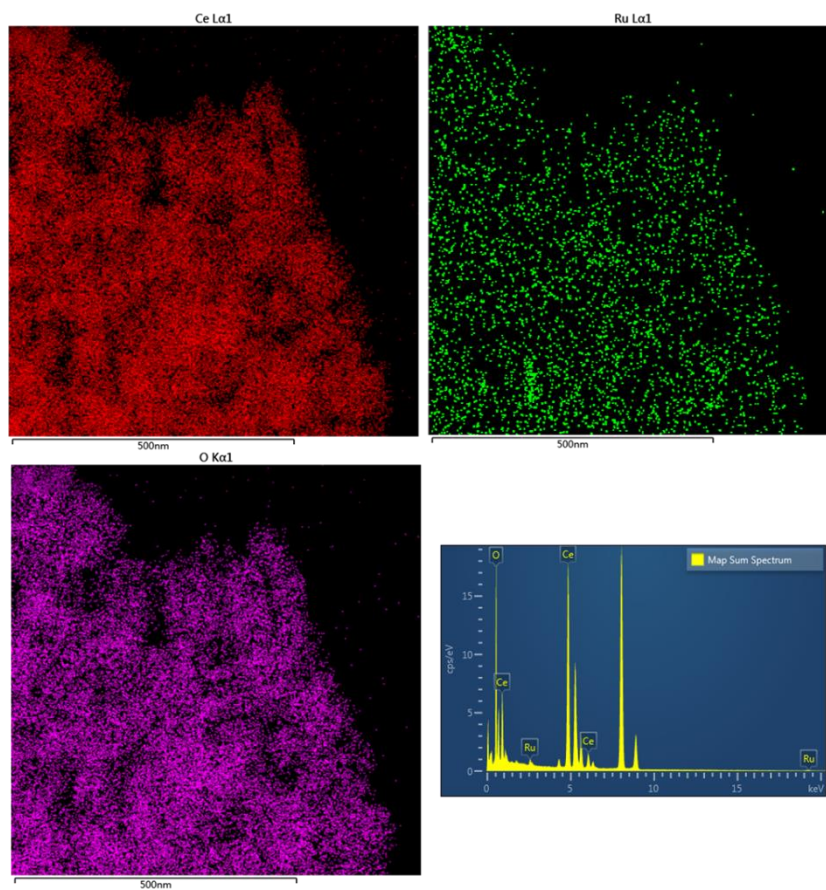

Figure S2: Ce, Ru and O mapping with EDS spectrum of the Ru/CeO<sub>2</sub>-NCs catalyst.

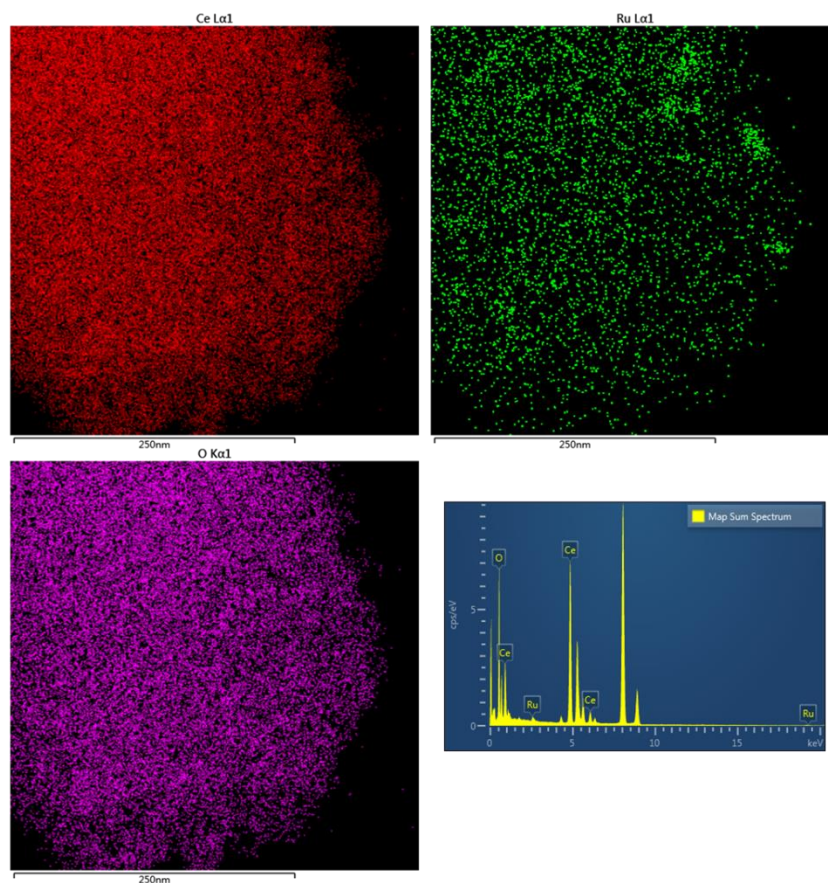

Figure S3: Ce, Ru and O mapping with EDS spectrum of the NRu/CeO<sub>2</sub>-NPs catalyst.
